# Supplementary material for: Advancing homogeneous catalysis for parahydrogen-derived hyperpolarisation and its NMR applications
Source: Royal Society of Chemistry journal article supplement (doi:10.1039/d2sc00737a), 2022-01-01
Supplement: d2sc00737a1.pdf [file d2sc00737a1.pdf]

## Supporting Information

### Advancing Homogeneous Catalysis for Parahydrogen-Derived Hyperpolarisation and its NMR Applications

Ben. J. Tickner<sup>a,b\*</sup> and Vladimir V. Zhivonitko<sup>a\*</sup>

<sup>a</sup> NMR Research Unit, Faculty of Science, University of Oulu, P.O. Box 3000, 90014 Oulu, Finland.

<sup>b</sup> Department of Chemical and Biological Physics, Faculty of Chemistry, Weizmann Institute of Science, Rehovot, 7610001, Israel.

\* Corresponding authors: [ben.tickner@alumni.york.ac.uk](mailto:ben.tickner@alumni.york.ac.uk) and [vladimir.zhivonitko@oulu.fi](mailto:vladimir.zhivonitko@oulu.fi)

A range of SABRE active complexes with different NHC auxiliary ligands have been reported (see Figure 12 and 13 of the manuscript) which exhibit a variety of steric and electronic properties. These can be quantified by use of % Buried Volumes (%BurV) or Tolman Electronic Parameters (TEP) respectively (Table S1). We provide here a comparison of the different %BurV and TEP parameters for IMes-derived ligands used in SABRE hyperpolarisation experiments.

Table S1: Summary of electronic and steric properties of SABRE polarisation transfer catalysts with a variety of NHC ligands.

| No.   | Abbreviation                                    | R <sub>1</sub>                    | R <sub>2</sub>  | R <sub>3</sub>                                       | R <sub>4</sub>                  | R <sub>5</sub>                  | TEP /cm <sup>-1</sup> | BurV /%           | Ref.        |
|-------|-------------------------------------------------|-----------------------------------|-----------------|------------------------------------------------------|---------------------------------|---------------------------------|-----------------------|-------------------|-------------|
| 5     | IMe                                             | CH <sub>3</sub>                   | H               | CH <sub>3</sub>                                      | -                               | -                               | 2054.1 <sup>‡</sup>   | 26.3 <sup>‡</sup> | [48]        |
| 6     | ImNPr <sup>t</sup> <sub>2</sub>                 | CH(CH <sub>3</sub> ) <sub>2</sub> | H               | CH(CH <sub>3</sub> ) <sub>2</sub>                    | -                               | -                               | 2050.4 <sup>‡</sup>   | 26.4 <sup>®</sup> | [154],[155] |
| 7     | ImMe <sub>2</sub> NPr <sup>t</sup> <sub>2</sub> | CH(CH <sub>3</sub> ) <sub>2</sub> | CH <sub>3</sub> | CH(CH <sub>3</sub> ) <sub>2</sub>                    | -                               | -                               | 2049.6 <sup>‡</sup>   | 38.4 <sup>‡</sup> | [48]        |
| 8     | ItBu                                            | <sup>t</sup> Bu                   | H               | <sup>t</sup> Bu                                      | -                               | -                               | 2048.9 <sup>‡</sup>   | 35.5 <sup>®</sup> | [155]       |
| 9     | Icy                                             | Cyclohexyl                        | H               | Cyclohexyl                                           | -                               | -                               | 2049.5 <sup>‡</sup>   | 27.1 <sup>®</sup> | [154],[155] |
| 10    | Iad                                             | Adamantyl                         | H               | Adamantyl                                            | -                               | -                               | 2049.6 <sup>‡</sup>   | 27.4 <sup>‡</sup> | [48]        |
| 11    | -                                               | Ph                                | H               | CH <sub>3</sub>                                      | -                               | -                               | 2048.3 <sup>‡</sup>   | 36.1 <sup>®</sup> | [155]       |
| 12    | -                                               | Mesityl                           | H               | CH <sub>3</sub>                                      | -                               | -                               | -                     | -                 | [163]       |
| 13    | -                                               | Mesityl                           | H               | CH <sub>2</sub> Ph                                   | -                               | -                               | -                     | -                 | [163]       |
| 14    | -                                               | Mesityl                           | H               | CH <sub>2</sub> CH <sub>2</sub> Ph                   | -                               | -                               | -                     | -                 | [163]       |
| 15    | SIImNPr <sup>t</sup> <sub>2</sub>               | CH(CH <sub>3</sub> ) <sub>2</sub> | H               | CH(CH <sub>3</sub> ) <sub>2</sub>                    | -                               | -                               | 2050.8 <sup>‡</sup>   | 28.5 <sup>®</sup> | [154],[155] |
| 16    | ipr-NHC                                         | Mesityl                           | H               | CH(CH <sub>3</sub> ) <sub>2</sub>                    | -                               | -                               | -                     | -                 | [156]       |
| 17    | Si-NHC                                          | Mesityl                           | H               | (CH <sub>2</sub> ) <sub>3</sub> Si(OEt) <sub>3</sub> | -                               | -                               | -                     | -                 | [156]       |
| 18    | tzNHC                                           | Mesityl                           | CH <sub>3</sub> | Ph                                                   | -                               | -                               | -                     | -                 | [156]       |
| 19    | CAAC-NHC                                        | CH(CH <sub>3</sub> ) <sub>2</sub> | -               | -                                                    | -                               | -                               | -                     | -                 | [156]       |
| 20    | IMes                                            | CH <sub>3</sub>                   | H               | CH <sub>3</sub>                                      | H                               | H                               | 2049.6 <sup>‡</sup>   | 31.6 <sup>®</sup> | [154],[155] |
|       |                                                 |                                   |                 |                                                      |                                 |                                 | 2049.6 <sup>#</sup>   | 31.6              | [153]       |
|       |                                                 |                                   |                 |                                                      |                                 |                                 | 2050.7 <sup>‡</sup>   | 36.5 <sup>‡</sup> | [48]        |
| 21    | -                                               | CH <sub>3</sub>                   | H               | H                                                    | H                               | H                               | 2050.5 <sup>#</sup>   | 30.5              | [153]       |
| 22    | -                                               | H                                 | H               | CH <sub>3</sub>                                      | H                               | H                               | 2050.6 <sup>#</sup>   | 31.6              | [153]       |
| 23    | -                                               | H                                 | H               | CH <sub>2</sub> CH <sub>3</sub>                      | H                               | H                               | 2049.8 <sup>#</sup>   | 31.7              | [153]       |
| 24    | IPr                                             | H                                 | H               | CH(CH <sub>3</sub> ) <sub>2</sub>                    | H                               | H                               | 2050.1 <sup>#</sup>   | 32.6              | [153]       |
|       |                                                 |                                   |                 |                                                      |                                 |                                 | 2050.2 <sup>‡</sup>   | 33.6 <sup>®</sup> | [154],[155] |
|       |                                                 |                                   |                 |                                                      |                                 |                                 | 2051.5 <sup>‡</sup>   | 44.5 <sup>‡</sup> | [48]        |
| 25    | -                                               | H                                 | CH <sub>3</sub> | H                                                    | H                               | H                               | 2049.6 <sup>#</sup>   | 30.5              | [153]       |
| 26    | -                                               | CH <sub>3</sub>                   | CH <sub>3</sub> | H                                                    | H                               | H                               | 2048.9 <sup>#</sup>   | 30.5              | [153]       |
| 27    | -                                               | F                                 | H               | CH <sub>3</sub>                                      | H                               | H                               | 2051.4 <sup>#</sup>   | 31.7              | [153]       |
| 28    | -                                               | Cl                                | H               | CH <sub>3</sub>                                      | H                               | H                               | 2051.7 <sup>#</sup>   | 31.7              | [153]       |
| 29    | -                                               | Br                                | H               | CH <sub>3</sub>                                      | H                               | H                               | 2051.9 <sup>#</sup>   | 31.7              | [153]       |
| 30    | -                                               | I                                 | H               | CH <sub>3</sub>                                      | H                               | H                               | 2051.9 <sup>#</sup>   | 31.7              | [153]       |
| 31    | -                                               | CO <sub>2</sub> Me                | H               | CH <sub>3</sub>                                      | H                               | H                               | 2052.2 <sup>#</sup>   | 31.8              | [153]       |
| 32    | -                                               | OTf                               | H               | CH <sub>3</sub>                                      | H                               | H                               | 2053.2 <sup>#</sup>   | 31.8              | [153]       |
| 33    | -                                               | OAc                               | H               | CH <sub>3</sub>                                      | H                               | H                               | 2051.3 <sup>#</sup>   | 31.7              | [153]       |
| 34    | -                                               | Ph                                | H               | CH <sub>3</sub>                                      | H                               | H                               | 2050.4 <sup>#</sup>   | 31.7              | [153]       |
| 35    | -                                               | <sup>t</sup> Bu                   | H               | CH <sub>3</sub>                                      | H                               | H                               | 2049.6 <sup>#</sup>   | 31.7              | [153]       |
| 36    | -                                               | OMe                               | H               | CH <sub>3</sub>                                      | H                               | H                               | 2049.3 <sup>#</sup>   | 31.5              | [153]       |
| 37    | -                                               | NMe <sub>2</sub>                  | H               | CH <sub>3</sub>                                      | H                               | H                               | 2047.6 <sup>#</sup>   | 31.6              | [153]       |
| 38    | -                                               | CH <sub>3</sub>                   | H               | CH <sub>3</sub>                                      | CH <sub>3</sub>                 | CH <sub>3</sub>                 | 2047.2 <sup>#</sup>   | 31.4              | [153]       |
| 39    | -                                               | CH <sub>3</sub>                   | H               | CH <sub>3</sub>                                      | CH <sub>2</sub> CH <sub>3</sub> | CH <sub>2</sub> CH <sub>3</sub> | 2047.8 <sup>#</sup>   | 31.6              | [153]       |
| 40    | -                                               | CH <sub>3</sub>                   | H               | CH <sub>3</sub>                                      | Cl                              | Cl                              | 2052.8 <sup>#</sup>   | 31.7              | [153]       |
| 41    | -                                               | CH <sub>3</sub>                   | H               | CH <sub>3</sub>                                      | Br                              | Br                              | 2052.4 <sup>#</sup>   | 31.8              | [153]       |
| 42    | -                                               | Cl                                | H               | CH <sub>3</sub>                                      | Cl                              | Cl                              | 2054.9 <sup>#</sup>   | 31.8              | [153]       |
| 43    | -                                               | H                                 | H               | CH(Et) <sub>2</sub>                                  | H                               | H                               | 2048.3 <sup>‡</sup>   | -                 | [154]       |
| 44    | -                                               | CH <sub>3</sub>                   | H               | CH <sub>3</sub>                                      | NMe <sub>2</sub>                | H                               | -                     | -                 | [212]       |
| 45    | SIMes                                           | CH <sub>3</sub>                   | H               | CH <sub>3</sub>                                      | H                               | H                               | 2050.8 <sup>‡</sup>   | 32.7 <sup>®</sup> | [154],[155] |
|       |                                                 |                                   |                 |                                                      |                                 |                                 | 2051.5 <sup>‡</sup>   | 36.9 <sup>‡</sup> | [48]        |
| 46    | SIPr                                            | H                                 | H               | CH(CH <sub>3</sub> ) <sub>2</sub>                    | H                               | H                               | 2051.1 <sup>‡</sup>   | 35.7 <sup>®</sup> | [154],[155] |
|       |                                                 |                                   |                 |                                                      |                                 |                                 | 2052.2 <sup>‡</sup>   | 47.0 <sup>‡</sup> | [48]        |
| 47-51 | -                                               | -                                 | -               | -                                                    | -                               | -                               | -                     | -                 | [161]-[163] |

<sup>‡</sup>These values were calculated using density functional theory involving [Ni(CO)<sub>2</sub>(NHC)] and were originally reported in Ref. no. [151]

<sup>#</sup>Ref. no. [154] presented average infrared carbonyl stretching frequencies ( $\nu_{CO,av}$ ) of [Ir(NHC)(CO)<sub>2</sub>Cl]. TEP values were calculated from these in our work according to the established equation  $TEP = 0.847\nu_{CO,av} + 336$  consistent with other works.<sup>152,153</sup>

<sup>®</sup>These values were calculated in Ref. no. [155] from X-ray crystal structures of [Ir(NHC)(CO)<sub>2</sub>Cl] reported in Ref. no. [152].

<sup>‡</sup>Values determined from average infrared carbonyl stretching frequencies ( $\nu_{CO,av}$ ) of [Ir(NHC)(CO)<sub>2</sub>Cl]

Note that reference numbers correspond to those that appear in the main manuscript
